# Supplementary material for: B-Cyclin/CDKs Regulate Mitotic Spindle Assembly by Phosphorylating Kinesins-5 in Budding Yeast
Source: PLoS Genet. 2010 May 6;6(5):e1000935. doi: 10.1371/journal.pgen.1000935 (PMC2865516; doi:10.1371/journal.pgen.1000935)
Supplement: Table S1 — Peak intensities measured for phosphopeptides and their corresponding unphosphorylated forms identified during LC/MS/MS analysis of Kip1-myc12 and Cin8-myc12. Confidently assigned phosphorylation sites are indicated with an asterisk (*) while phosphorylation site assigned with less confidence are indicated with a number sign/hash (#); the latter are the most likely sites on the respective phosphopeptides and were verified through repeated observation and confident assignments in other phosphopeptides or in other strains. Candidate kinases for each assigned phosphorylation site are also listed. (0.02 MB XLS) [file pgen.1000935.s007.xls]

## Sheet: Sheet2
Strain	Unphosphorylated peptide	Peak intensity	Phosphopeptide	Peak intensity	Phopshorylation site(s) identified	Ratio of peak intensity for phosphorylated to unphosphorylated form	Candidate kinase for identified phosphorylation site
Cin8-myc12
SBY750 (wild-type)	TKSLPNTIK	Not found	TKS*LPNTIK	22000000	Ser 261	N.A.	Aurora kinase/ ATM kinase
	LSNINSNSVQSVISPK	82300000	LSNINSNSVQSVIS*PK	33000000	Ser 972	0.400972	cyclin-dependent kinase (CDK)
	IFDSSTANNTTSNSASSSR	53900000	IFDSSTANNTTSNS*ASSSR	422000	Ser 227	0.00782931	ATM kinase
	LISEEDLNGLDRC	41400000	LIS*EEDLNGLDRC	699000	c-myc tag	0.0168841	casein kinase II (CKII)
	LISEEDLNGLDGEQR	77800000	LIS*EEDLNGLDGEQR	495000	c-myc tag	0.00636247	CKII
	LISEEDLNGLDGEQK	105000000	LIS*EEDLNGLDGEQK	2460000	c-myc tag	0.0234286	CKII
	LISEEDLNGEQK	272000000	LIS*EEDLNGEQK	10300000	c-myc tag	0.0378676	CKII
	KHAIEDENKSSENVDNEGSR	19100000	KHAIEDENKS*SENVDNEGSR	845000	Ser 984	0.0442408	choline kinase (CKI)
SBY791 (PGAL1-SIC1∆3P)	KSLPNTIK	Not found	KS*LPNTIK	10400000	Ser 261	N.A.	Aurora kinase
	LSNINSNSVQSVISPK	62200000	LSNINSNSVQSVIS*PK	4450000	Ser 972	0.0715434	CDK
	SLPNTIK	62900000	S*LPNTIK	915000	Ser 261	0.0145469	Aurora kinase/ ATM kinase
	LISEEDLNGLDGEQR	38300000	LIS*EEDLNGLDGEQR	91700	c-myc tag	0.00239426	CKII
	LISEEDLNGLDGEQK	74700000	LIS*EEDLNGLDGEQK	217000	c-myc tag	0.00290495	CKII
	LISEEDLNGEQK	257000000	LIS*EEDLNGEQK	1870000	c-myc tag	0.00727626	CKII
	KHAIEDENKSSENVDNEGSR	15800000	KHAIEDENKS*SENVDNEGSR	603000	Ser 984	0.0381646	choline kinase (CKI)
SBY1680 (YEpGAL-CLB2-HA3)	TKSLPNTIK	Not found	TKS*LPNTIK	2770000	Ser 261	N.A.	Aurora kinase/ ATM kinase
	LSNINSNSVQSVISPK	15300000	LSNINSNSVQSVIS*PK	8390000	Ser 972	0.548366	CDK
	LISEEDLNGLDGEQK	48400000	LIS*EEDLNGLDGEQK	147000	c-myc tag	0.00303719	CKII
	LISEEDLNGEQK	189000000	LIS*EEDLNGEQK	529000	c-myc tag	0.00279894	CKII
Kip1-myc12
SBY748 (wild-type)	TCIPNLSTNENFPLSQFSPKTPVPVPDQPLPK	Not found	TCIPNLSTNENFPLSQFSPKT*PVPVPDQPLPK	1080000	Thr 1040	N.A.	CDK
	TCIPNLSTNENFPLSQFSPKTPVPVPDQPLPK	Not found	TCIPNLSTNENFPLSQFS#PKT*PVPVPDQPLPK	1810000	Ser 1037, Thr 1040	N.A.	CDK
	TCIPNLSTNENFPLSQFSPK	22600000	TCIPNLSTNENFPLSQFS*PK	1590000	Ser 1037	0.070354	CDK
	SKTLPNTEGTGR	9970000	SKT*LPNTEGTGR	430000	Thr 1068	0.0431294	protein kinase C (PKC)
	RFTTEPILK	14000000	RFT#TEPILK	3120000	Thr 1088	0.222857	protein kinase A (PKA)/PKC
	SINSAK	3630000	SINS*AK	254000	Ser 1060	0.0699725	PKC
	LISEEDLNGLDRC	41600000	LIS*EEDLNGLDRC	413000	c-myc tag	0.00992788	CKII
	LISEEDLNGLDGEQK	145000000	LIS*EEDLNGLDGEQK	2550000	c-myc tag	0.0175862	CKII
	LISEEDLNGEQK	244000000	LIS*EEDLNGEQK	8760000	c-myc tag	0.0359016	CKII
	LHQLSEEDLNGLDGEQK	11400000	LHQLS*EEDLNGLDGEQK	1880000	c-myc tag	0.164912	CKII
	SFLELYNENLKDLLSDSEDDDPAVNDPK	3120000	SFLELYNENLKDLLS#DSEDDDPAVNDPK	156000	Ser 213	0.05	casein kinase II (CKII)
	DLLSDSEDDDPAVNDPK	10300000	DLLS*DSEDDDPAVNDPK	259000	Ser 213	0.0251456	CKII
SBY789 (PGAL1-SIC1∆3P)	TCIPNLSTNENFPLSQFSPKTPVPVPDQPLPK	Not found	TCIPNLSTNENFPLSQFS#PKT#PVPVPDQPLPK	46700	Ser 1037, Thr 1040	N.A.	CDK
	TCIPNLSTNENFPLSQFSPK	7540000	TCIPNLSTNENFPLSQFS*PK	153000	Ser 1037	0.0202918	CDK
	SKTLPNTEGTGR	229000	SKT*LPNTEGTGR	770000	Thr 1068	3.36245	PKC
	RFTTEPILK	16000000	RFT#TEPILK	7710000	Thr 1088	0.481875	PKA/ PKC
	TQDEVLSEHCEK	43900000	TQDEVLS*EHCEK	246000	Ser 952	0.00560364	CKII
	TPVPVPDQPLPK	177000000	T*PVPVPDQPLPK	2830000	Thr 1040	0.0159887	CDK
	LISEEDLNGLDRC	29500000	LIS*EEDLNGLDRC	161000	c-myc tag	0.00545763	CKII
	LISEEDLNGLDGEQK	12500000	LIS*EEDLNGLDGEQK	991000	c-myc tag	0.07928	CKII
	LISEEDLNGEQK	398000000	LIS*EEDLNGEQK	5730000	c-myc tag	0.014397	CKII
	LHQLSEEDLNGLDGEQK	6990000	LHQLS*EEDLNGLDGEQK	1090000	c-myc tag	0.155937	CKII
	IHSDSIASLAHNAENTLK	81100000	IHSDS*IASLAHNAENTLK	555000	Ser 802	0.0068434	ATM kinase
	DLLSDSEDDDPAVNDPK	28500000	DLLS*DSEDDDPAVNDPK	751000	Ser 213	0.0263509	CKII
SBY1278 (YEpGAL-CLB2-HA3)	TCIPNLSTNENFPLSQFSPKTPVPVPDQPLPK	Not found	TCIPNLSTNENFPLSQFS*PKTPVPVPDQPLPK	110000	Ser 1037	N.A.	CDK
	TCIPNLSTNENFPLSQFSPKTPVPVPDQPLPK	Not found	TCIPNLSTNENFPLSQFS*PKT*PVPVPDQPLPK	36300	Ser 1037, Thr 1040	N.A.	CDK
	TCIPNLSTNENFPLSQFSPK	3780000	TCIPNLSTNENFPLSQFS*PK	327000	Ser 1037	0.0865079	CDK
	RFTTEPILK	10500000	RFT*TEPILK	1910000	Thr 1088	0.181905	PKA/ PKC
	SINSAK	1770000	SINS*AK	100000	Ser 1060	0.0564972	PKC
	LISEEDLNGEQK	270000000	LIS*EEDLNGEQK	819000	c-myc tag	0.00303333	CKII
	KLHQLSEEDLNGLDGEQK	5390000	KLHQLS*EEDLNGLDGEQK	352000	c-myc tag	0.0653061	CKII
	ISFLELYNENLKDLLSDSEDDDPAVNDPK	275000	ISFLELYNENLKDLLS#DSEDDDPAVNDPK	3740	Ser 213	0.0136	CKII
* confidently assigned phosphorylation site
# phosphorylation site assigned with less confidence but the most likely; verified through repeated observation and confident assignments in other phosphopeptides or in other strains
